# Supplementary material
Source: PubMed Central journal article supplement (PMC5702055)
Supplement: joces-130-205427-s1.pdf [file joces-130-205427-s1.pdf]

Pax-3 vs. Pax-7 [Mus musculus]

Range 1: homeodomain of Pax7 - 177 to 274

| Score         | Expect                                   | Method                       | Identities              | Positives   | Gaps      |
|---------------|------------------------------------------|------------------------------|-------------------------|-------------|-----------|
| 177 bits(450) | 4e-59                                    | Compositional matrix adjust. | 85/100(85%)             | 93/100(93%) | 2/100(2%) |
| Pax3 21       | EREKKAKHSIDGILSERASAPQSDEGSDIDSEPDLPKRRQ | RRSRRTT                      | TAEQLEELERAF            | 80          |           |
|               | + EKKAKHSIDGIL ++ + + DEGSD++SEPDLPKRRQ  | RRSRRTT                      | TAEQLEELE+AF            |             |           |
| Pax7 177      | DGEKKAKHSIDGILGDKGN--RLDEGSDVESEPDLPKRRQ | RRSRRTT                      | TAEQLEELEKAF            | 234         |           |
| Pax3 81       | ERTHYPDIYTR                              | EELAQR                       | AKLTEARVQVWFSNRRARWRKQA | 120         |           |
|               | ERTHYPDIYTR                              | EELAQR                       | KLTEARVQVWFSNRRARWRKQA  |             |           |
| Pax7 235      | ERTHYPDIYTR                              | EELAQR                       | TKLTEARVQVWFSNRRARWRKQA | 274         |           |

Figure S1. Comparison of Pax3 and Pax7 homeodomains. Alignment of the homeodomains shows the high level of conservation of this domain, with perfect identity of all DNA-interacting residues. Yellow indicates amino acids that make specific base contacts. Green indicates amino acids that make other DNA contacts. Middle row indicates sequence identities/similarities. Source: [ncbi.nlm.nih.gov/Structure/](http://ncbi.nlm.nih.gov/Structure/)
